# Supplementary material for: Dose-dependent effects of oral cannabidiol and delta-9-tetrahydrocannabinol on serum anandamide and related N-acylethanolamines in healthy volunteers
Source: PubMed Central journal article supplement (PMC11409355; doi:10.1136/bmjment-2024-301027), 2024-08-24
Supplement: bmjment-27-1-s001.pdf [file bmjment-27-1-s001.pdf]

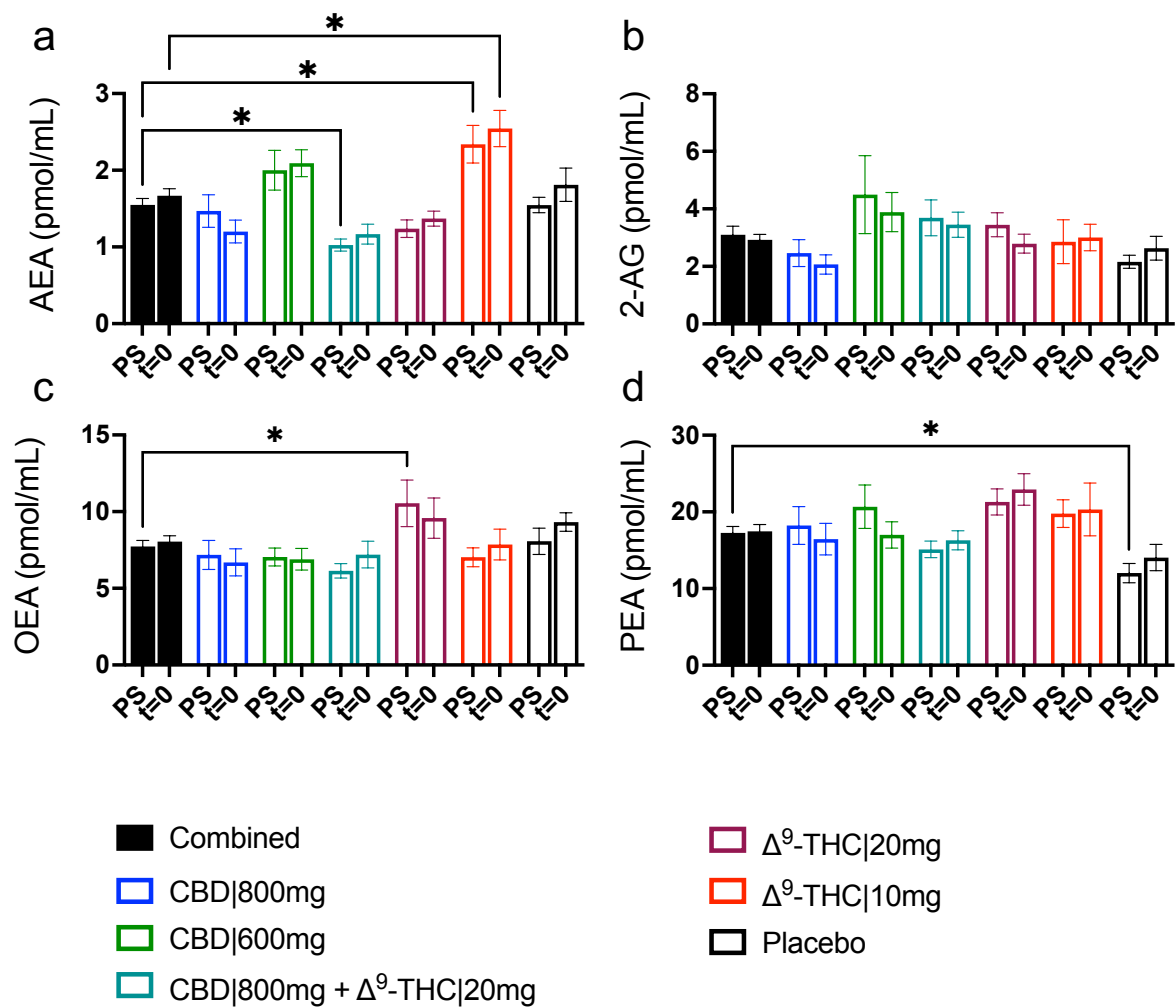

**Supplementary Figure 1.** Endogenous (A) AEA, (B) 2-AG, (C) OEA and (D) PEA concentrations at pre-screen (PS) and baseline (t=0), comparing respective cohorts (CBD|800mg, CBD|600mg, CBD|800mg +  $\Delta^9$ -THC|20mg,  $\Delta^9$ -THC|10mg, placebo) to the average of all participants (“combined”). Asterix (\*) denotes a significant variation in PS or t=0 measures (2way ANOVA, Benjamini, Krieger and Yekutieli corrected,  $p < 0.05$ ) for a particular cohort, compared to the combined average of that time-point measured.
