# Supplementary material for: Dose-dependent effects of oral cannabidiol and delta-9-tetrahydrocannabinol on serum anandamide and related N-acylethanolamines in healthy volunteers
Source: PubMed Central journal article supplement (PMC11409355; doi:10.1136/bmjment-2024-301027), 2024-08-24
Supplement: bmjment-27-1-s003.pdf [file bmjment-27-1-s003.pdf]

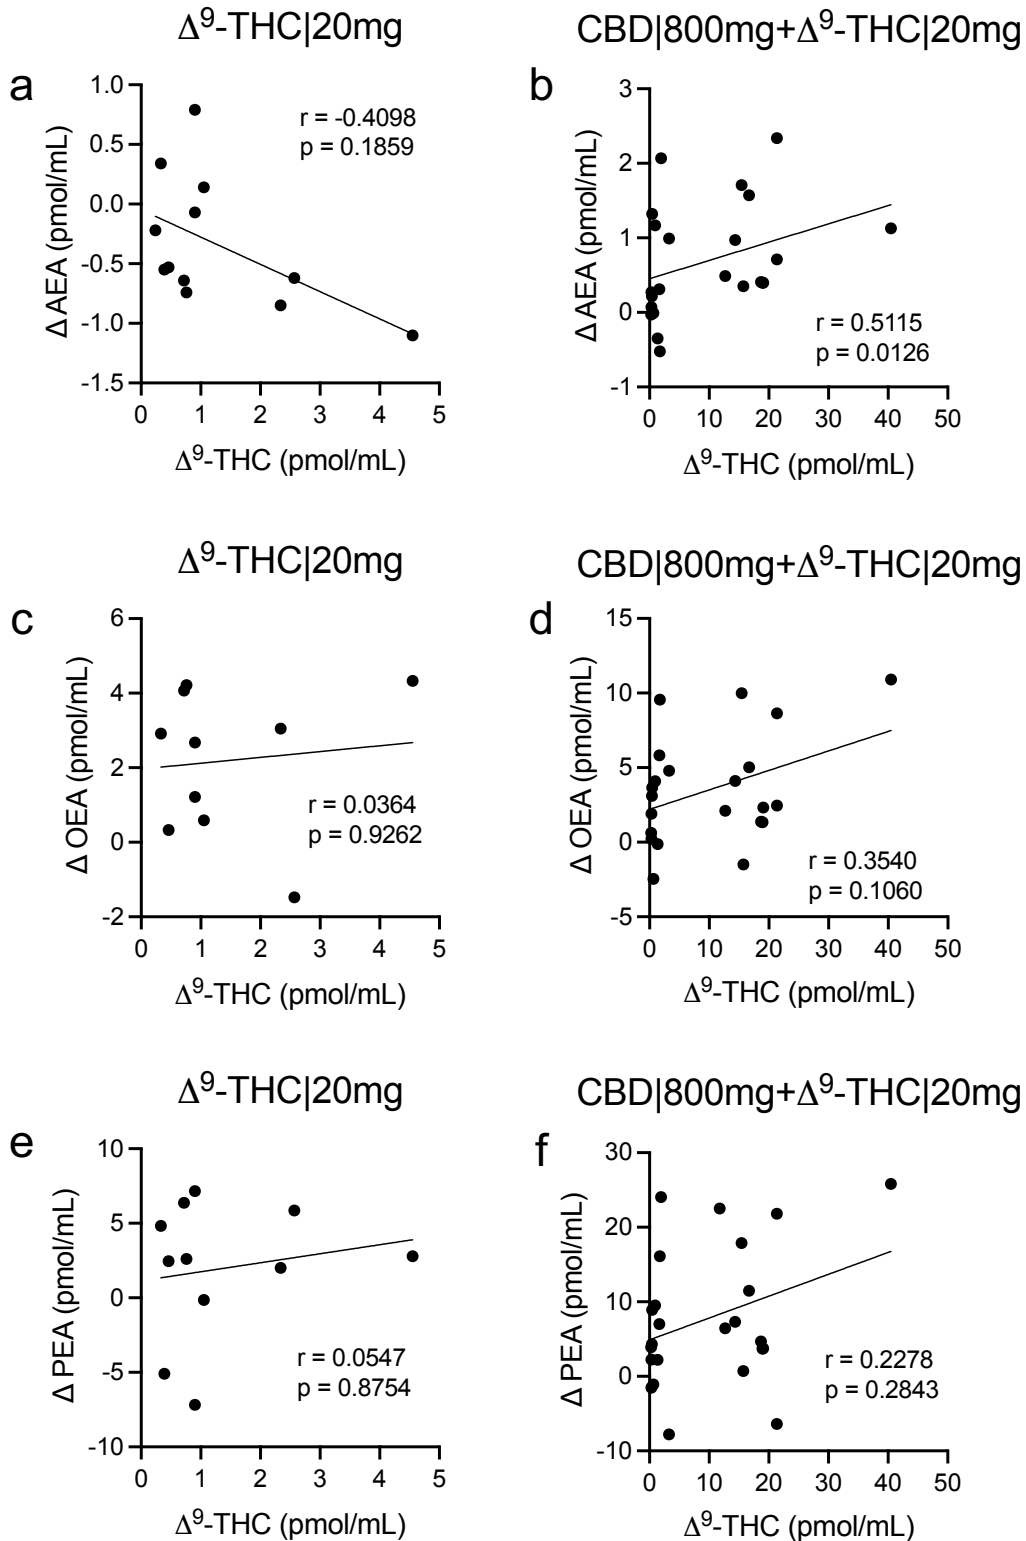

**Supplementary Figure 3.**  $\Delta^9$ -THC associations with changes to baseline (t=0) of (A-B) AEA, (C-D) OEA and (E-F) PEA. Differences to AEA/NAEs at 65 and 165min post-administration are presented on the y-axis ( $\Delta$  pmol/mL) against  $\Delta^9$ -THC concentrations for same timepoints on the x-axis (pmol/mL) for (A, C, E)  $\Delta^9$ -THC|20mg and (B, D, F) CBD|800mg +  $\Delta^9$ -THC|20mg. Correlations were determined by Spearman analysis at a confidence interval of 95%. The coefficient of correlation ( $r$ ) and  $p$ -values are shown. List of abbreviations: CBD, cannabidiol; AEA, anandamide; OEA, oleoylethanolamide; PEA, palmitoylethanolamide.
