# Supplementary material for: Dose-dependent effects of oral cannabidiol and delta-9-tetrahydrocannabinol on serum anandamide and related N-acylethanolamines in healthy volunteers
Source: PubMed Central journal article supplement (PMC11409355; doi:10.1136/bmjment-2024-301027), 2024-08-24
Supplement: bmjment-27-1-s004.pdf [file bmjment-27-1-s004.pdf]

**Supplementary Table 1.** Operational parameters for TSQ Altis analysis of eCBs/NAEs.

| Analyte                                                                               | Precursor → Product ( <i>m/z</i> ) | CE [V]       | RF Lens [V] |
|---------------------------------------------------------------------------------------|------------------------------------|--------------|-------------|
| AEA                                                                                   | 348.2 → 287.2                      | 14.00        | 84          |
|                                                                                       | 348.2 → 62.2                       | <i>18.00</i> | <i>84</i>   |
| [ <sup>2</sup> H <sub>4</sub> ]-AEA                                                   | 352.4 → 287.2                      | 19.00        | 74          |
|                                                                                       | 352.4 → 66.2                       | <i>14.00</i> | <i>74</i>   |
| OEA                                                                                   | 326.3 → 62                         | 17.22        | 67          |
|                                                                                       | 326.3 → 44.1                       | <i>41.94</i> | <i>67</i>   |
| [ <sup>2</sup> H <sub>4</sub> ]-OEA                                                   | 328.2 → 62                         | 17.76        | 65          |
|                                                                                       | 328.2 → 44.1                       | <i>45.35</i> | <i>65</i>   |
| PEA                                                                                   | 300.2 → 62                         | 15.99        | 62          |
|                                                                                       | 300.2 → 44.1                       | <i>18.94</i> | <i>62</i>   |
| [ <sup>2</sup> H <sub>4</sub> ]-PEA                                                   | 304.2 → 62                         | 16.33        | 62          |
|                                                                                       | 304.2 → 44.1                       | <i>19.79</i> | <i>62</i>   |
| 2-AG                                                                                  | 379.3 → 287.2                      | 19.00        | 89          |
|                                                                                       | 379.3 → 269.2                      | <i>20.00</i> | <i>89</i>   |
| [ <sup>2</sup> H <sub>4</sub> ]-2-AG                                                  | 384.3 → 287.2                      | 16.00        | 80          |
|                                                                                       | 384.3 → 269.2                      | <i>17.00</i> | <i>80</i>   |
| CBD/ $\Delta^9$ -THC                                                                  | 315.2 → 193.2                      | 22.31        | 74          |
|                                                                                       | 315.2 → 259.1                      | <i>19.74</i> | <i>70</i>   |
| [ <sup>2</sup> H <sub>4</sub> ]- CBD/[ <sup>2</sup> H <sub>4</sub> ]- $\Delta^9$ -THC | 318.3 → 196.2                      | 24.33        | 66          |
|                                                                                       | 318.3 → 262.1                      | <i>19.79</i> | <i>66</i>   |

Transitions in *italics* were used as qualifier ions. List of abbreviations: CBD, cannabidiol;  $\Delta^9$ -THC, delta-9-tetrahydrocannabinol; AEA, anandamide; 2-AG, 2-arachidonoylglycerol; OEA, oleoylethanolamine; PEA, palmitoylethanolamine; CE, collision energy; RF, Radio frequency; *m/z*, mass to charge ratio.
