# Supplementary material for: Dose-dependent effects of oral cannabidiol and delta-9-tetrahydrocannabinol on serum anandamide and related N-acylethanolamines in healthy volunteers
Source: PubMed Central journal article supplement (PMC11409355; doi:10.1136/bmjment-2024-301027), 2024-08-24
Supplement: bmjment-27-1-s005.pdf [file bmjment-27-1-s005.pdf]

**Supplementary Table 2.** Mean values for CBD,  $\Delta^9$ -THC eCBs and NAEs, per treatment group (pmol/mL), alongside individual and adjusted p-values representing changes in concentration (65 and 160min) from t=0

| eCB/NAE | Serum levels of eCBs/NAEs (pmol/mL) <sup>1</sup> |                          |                |                | 2-way ANOVA (comparison to t=0) |                                |                      |                                |
|---------|--------------------------------------------------|--------------------------|----------------|----------------|---------------------------------|--------------------------------|----------------------|--------------------------------|
|         | Medication                                       | Post drug administration |                |                | 65-min                          |                                | 160-min              |                                |
|         |                                                  | 0min                     | 65min          | 160min         | p-value <sup>2</sup>            | p <sub>corr</sub> <sup>3</sup> | p-value <sup>2</sup> | p <sub>corr</sub> <sup>3</sup> |
| AEA     | Placebo                                          | 1.866 ± 0.200            | 1.559 ± 0.132  | 1.850 ± 0.154  | 0.0840                          | 0.1765                         | 0.9354               | 0.9822                         |
|         | THC 10mg                                         | 2.554 ± 0.237            | 1.831 ± 0.130  | 2.182 ± 0.156  | <u>0.0013</u>                   | <b><u>0.0014</u></b>           | 0.1670               | 0.0877                         |
|         | THC 20mg                                         | 1.370 ± 0.098            | 1.031 ± 0.100  | 1.476 ± 0.113  | 0.0552                          | 0.1160                         | 0.5516               | 0.5791                         |
|         | CBD 600mg                                        | 1.992 ± 0.198            | 1.703 ± 0.209  | 1.828 ± 0.175  | 0.1162                          | 0.1534                         | 0.1461               | 0.1534                         |
|         | CBD 800mg                                        | 1.201 ± 0.149            | 1.530 ± 0.309  | 1.914 ± 0.302  | 0.0979                          | 0.0514                         | <u>0.0029</u>        | <b><u>0.0030</u></b>           |
|         | CBD 800mg + THC 20mg                             | 1.169 ± 0.149            | 1.628 ± 0.268  | 2.480 ± 0.421  | 0.0624                          | <b><u>0.0328</u></b>           | <u>0.0076</u>        | <b><u>0.0080</u></b>           |
| 2-AG    | Placebo                                          | 3.003 ± 0.461            | 3.046 ± 0.507  | 3.256 ± 0.832  | 0.8938                          | 0.9385                         | 0.6970               | 0.9385                         |
|         | THC 10mg                                         | 3.448 ± 0.437            | 3.951 ± 0.758  | 4.746 ± 1.130  | 0.2396                          | 0.2516                         | 0.1154               | 0.2423                         |
|         | THC 20mg                                         | 2.790 ± 0.326            | 2.919 ± 0.498  | 2.435 ± 0.366  | 0.8147                          | 0.8554                         | 0.4193               | 0.8554                         |
|         | CBD 600mg                                        | 3.887 ± 0.683            | 3.305 ± 0.516  | 3.872 ± 0.824  | <u>0.0331</u>                   | 0.0694                         | 0.9772               | 0.9999                         |
|         | CBD 800mg                                        | 2.066 ± 0.338            | 2.717 ± 0.448  | 2.876 ± 0.664  | 0.1064                          | 0.1773                         | 0.1689               | 0.1773                         |
|         | CBD 800mg + THC 20mg                             | 2.633 ± 0.412            | 2.654 ± 0.401  | 3.020 ± 0.486  | 0.9421                          | 0.9892                         | 0.0483               | 0.1015                         |
| OEA     | Placebo                                          | 9.322 ± 0.601            | 8.463 ± 0.669  | 10.088 ± 0.805 | 0.1496                          | 0.2557                         | 0.2435               | 0.2557                         |
|         | THC 10mg                                         | 7.857 ± 1.002            | 6.296 ± 0.572  | 8.162 ± 0.773  | 0.2200                          | 0.4621                         | 0.6554               | 0.6882                         |
|         | THC 20mg                                         | 7.857 ± 1.319            | 10.049 ± 0.783 | 9.758 ± 0.950  | 0.7295                          | 0.9346                         | 0.8901               | 0.9346                         |
|         | CBD 600mg                                        | 6.894 ± 0.704            | 6.065 ± 0.567  | 6.714 ± 0.734  | 0.0995                          | 0.2088                         | 0.8536               | 0.8962                         |
|         | CBD 800mg                                        | 6.692 ± 0.885            | 9.458 ± 1.480  | 9.577 ± 1.347  | <u>0.0126</u>                   | <b><u>0.0132</u></b>           | <u>0.0072</u>        | <b><u>0.0132</u></b>           |
|         | CBD 800mg + THC 20mg                             | 7.200 ± 0.870            | 12.225 ± 2.476 | 13.594 ± 2.549 | 0.0577                          | <b><u>0.0303</u></b>           | <u>0.0223</u>        | <b><u>0.0234</u></b>           |
| PEA     | Placebo                                          | 14.047 ± 1.703           | 15.586 ± 1.435 | 16.638 ± 1.871 | 0.2958                          | 0.3106                         | 0.1373               | 0.2883                         |
|         | THC 10mg                                         | 20.320 ± 3.435           | 15.923 ± 1.892 | 21.190 ± 1.737 | 0.1152                          | 0.2419                         | 0.8200               | 0.8610                         |
|         | THC 20mg                                         | 22.929 ± 2.065           | 23.294 ± 1.813 | 21.583 ± 2.013 | 0.8612                          | 0.9042                         | 0.5529               | 0.9042                         |
|         | CBD 600mg                                        | 17.000 ± 1.713           | 19.622 ± 4.120 | 17.630 ± 1.740 | 0.5708                          | 0.7796                         | 0.7425               | 0.7796                         |
|         | CBD 800mg                                        | 16.443 ± 2.063           | 22.907 ± 3.912 | 22.784 ± 3.456 | <u>0.0455</u>                   | <b><u>0.0478</u></b>           | <u>0.0193</u>        | <b><u>0.0405</u></b>           |
|         | CBD 800mg + THC 20mg                             | 16.294 ± 1.255           | 24.455 ± 3.912 | 28.775 ± 4.679 | 0.0991                          | 0.0520                         | <u>0.0181</u>        | <b><u>0.0190</u></b>           |

<sup>1</sup>Concentrations were expressed as mean ± standard error (SEM); <sup>2</sup>Unadjusted and <sup>3</sup>adjusted p-values for multiple comparisons using the two-stage Benjamini, Krieger and Yekutieli FDR method (p<sub>corr</sub>) are reported for changes in eCB and NAE expression (65 and 160min) from baseline (0min), with significant values highlighted (p < 0.05, underlined) and emphasised when adjusted for FDR (p<sub>corr</sub> < 0.05, **bold italics underlined**). Abbreviations, eCB: endocannabinoid; NAE: N-acylethanolamine; HVs: healthy volunteers; AEA: anandamide; 2-AG: 2-arachidonoylglycerol; OEA: oleoylethanolamine; PEA: palmitoylethanolamine.
